# Supplementary material
Source: Springer Nature journal article supplement (https://www.springermedizin.de/resource/supplementary/12950_2012_278_MOESM3_ESM.pdf/9557526)

**A**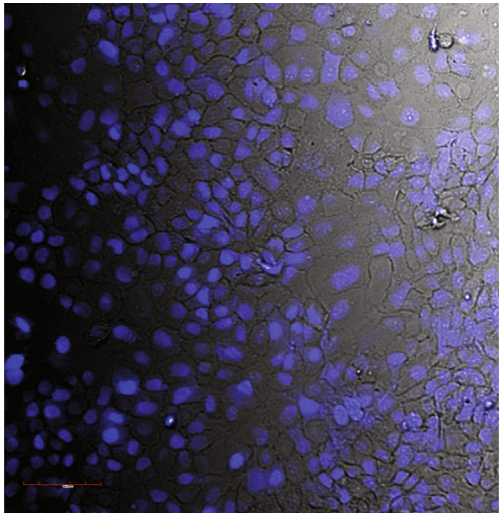**B**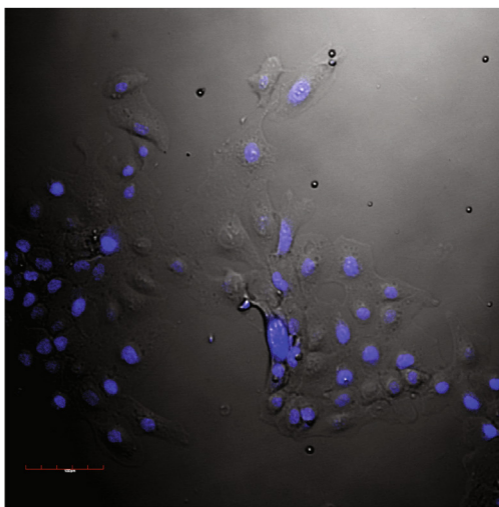**C**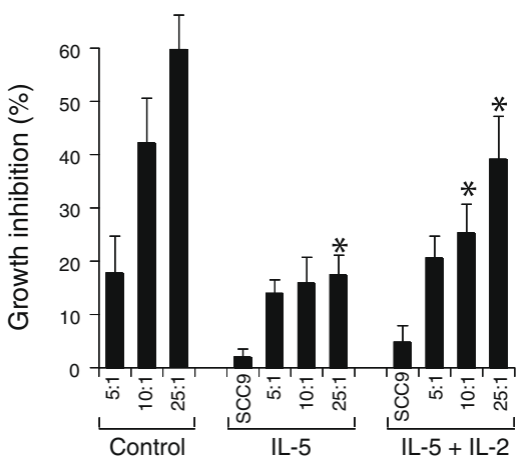

Supplement: MOESM3 [file 9557526]
